# Supplementary material for: Insights into the effect of regulation of molecular composition on the properties of (AuAg)9clusters
Source: Royal Society of Chemistry journal article supplement (doi:10.1039/d3dt00202k), 2023-01-01
Supplement: d3dt00202k1.pdf [file d3dt00202k1.pdf]

## Insights into the effect of regulation in molecular composition on the properties of (AuAg)<sub>9</sub> clusters

Xiaoxun Yan,<sup>‡</sup> Shangyu Su,<sup>‡</sup> Xiaowu Li, Shan Jin,<sup>\*</sup> Manzhou Zhu<sup>\*</sup>

Institutes of Physical Science and Information Technology and Centre for Atomic Engineering of Advanced Materials, Key Laboratory of Structure and Functional Regulation of Hybrid Materials of Ministry of Education, Department of Chemistry and Anhui Province Key Laboratory of Chemistry for Inorganic/Organic Hybrid Functionalized Materials, Anhui University, Hefei, Anhui 230601, China

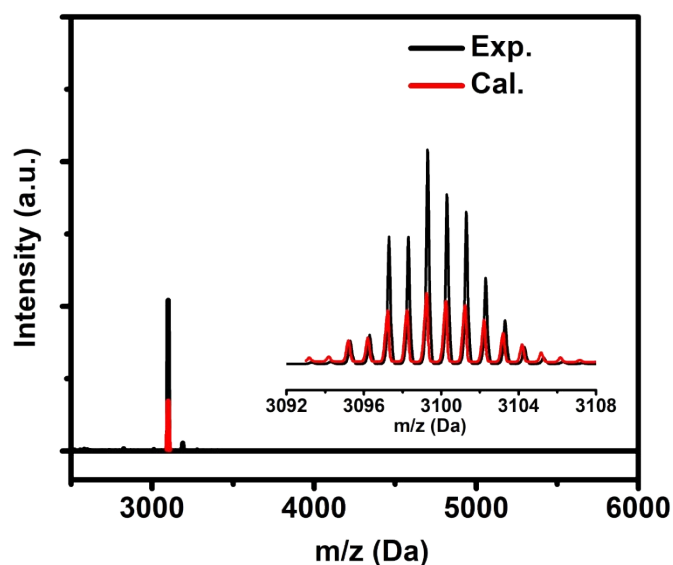

Figure S1. The ESI-MS data of [Au<sub>4</sub>Ag<sub>5</sub>(SAdm)<sub>6</sub>(Dppm)<sub>2</sub>](BPh<sub>4</sub>).

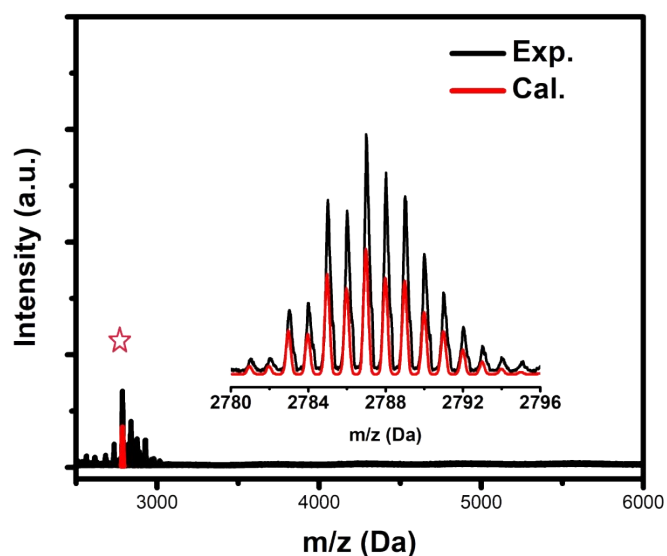

Figure S2. The ESI-MS data of [Au<sub>4</sub>Ag<sub>5</sub>(S-c-C<sub>6</sub>H<sub>11</sub>)<sub>6</sub>(Dppm)<sub>2</sub>](BPh<sub>4</sub>).

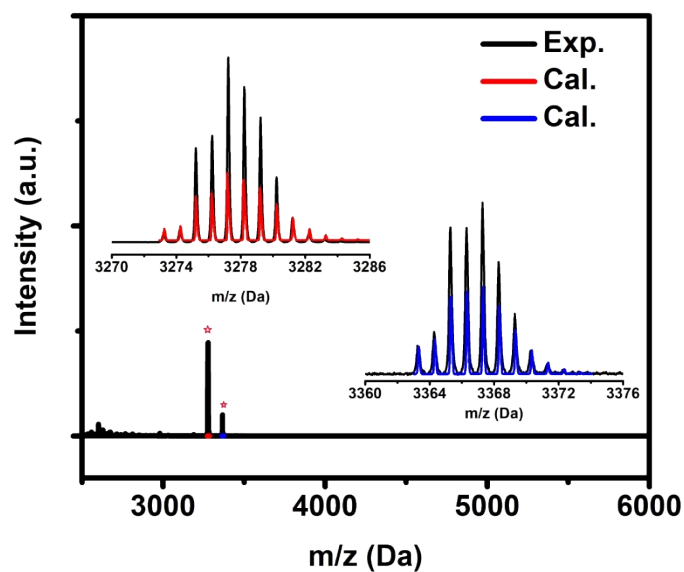

Figure S3. The ESI-MS data of  $[\text{Au}_{6.5}\text{Ag}_{2.5}(\text{SAdm})_6(\text{Dppm})_2](\text{BPh}_4)$ .

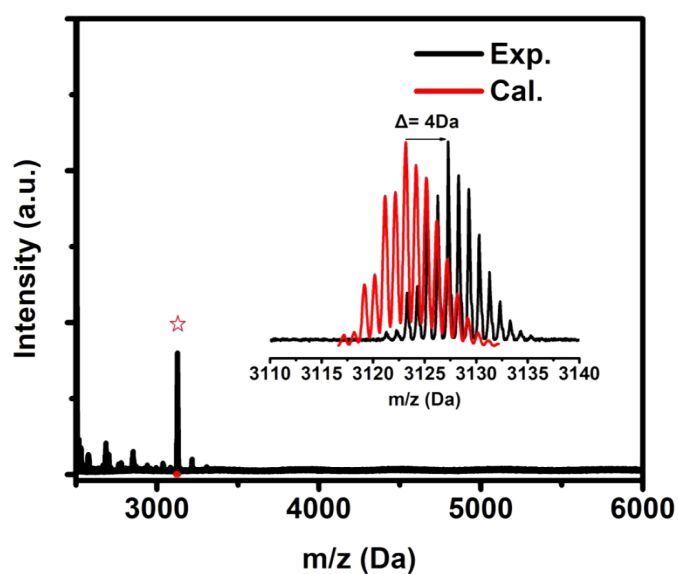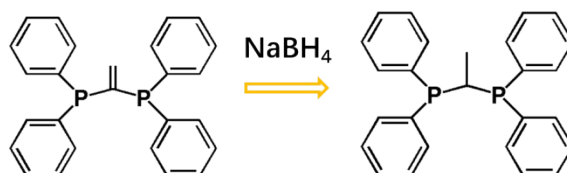

Figure S4. The ESI-MS data of  $[\text{Au}_4\text{Ag}_5(\text{SAdm})_6(\text{VDPP})_2](\text{BPh}_4)$ . The result indicated the  $(\text{Ph}_2\text{P})_2\text{C}=\text{CH}_2$  ligands are reduced to  $(\text{Ph}_2\text{P})_2\text{CH}-\text{CH}_3$  with a deviation of 2 Da for each phosphine ligand.

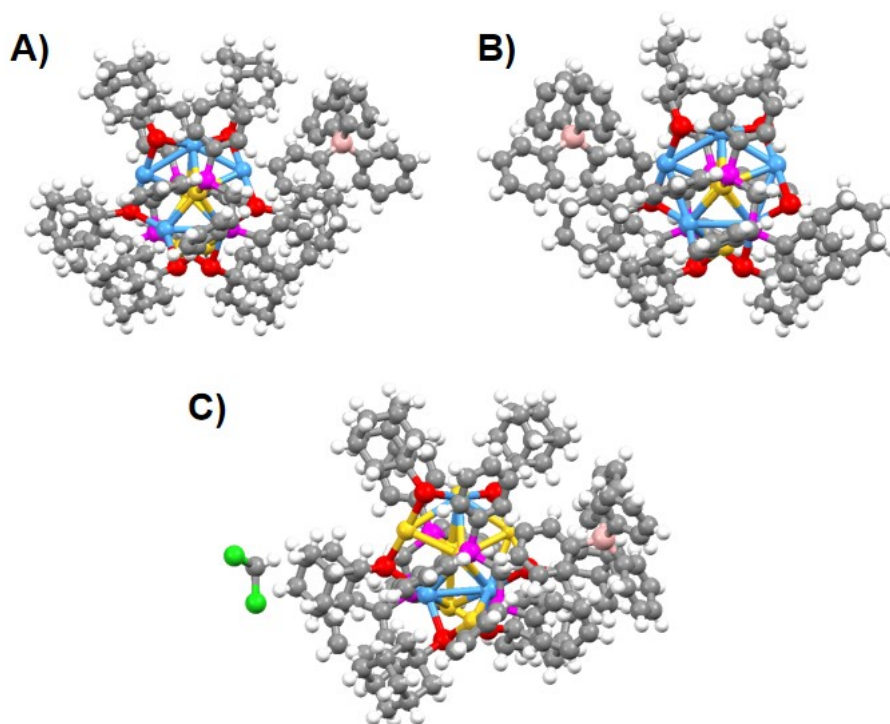

Figure S5. The overall structure of these nanoclusters. A)  $[\text{Au}_4\text{Ag}_5(\text{SAdm})_6(\text{Dppm})_2](\text{BPh}_4)$ ; B)  $[\text{Au}_4\text{Ag}_5(\text{S-c-C}_6\text{H}_{11})_6(\text{Dppm})_2](\text{BPh}_4)$ ; C)  $[\text{Au}_{6.5}\text{Ag}_{2.5}(\text{SAdm})_6(\text{Dppm})_2](\text{BPh}_4)$ .

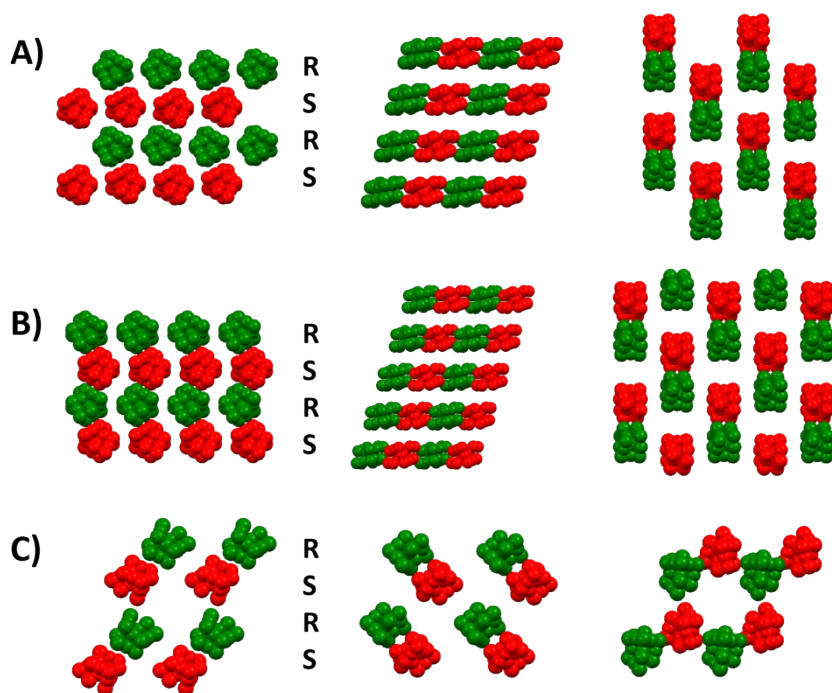

Figure S6. The the packing mode of these nanoclusters. A)  $[\text{Au}_4\text{Ag}_5(\text{SAdm})_6(\text{Dppm})_2](\text{BPh}_4)$ ; B)  $[\text{Au}_4\text{Ag}_5(\text{S-c-C}_6\text{H}_{11})_6(\text{Dppm})_2](\text{BPh}_4)$ ; C)  $[\text{Au}_{6.5}\text{Ag}_{2.5}(\text{SAdm})_6(\text{Dppm})_2](\text{BPh}_4)$ .

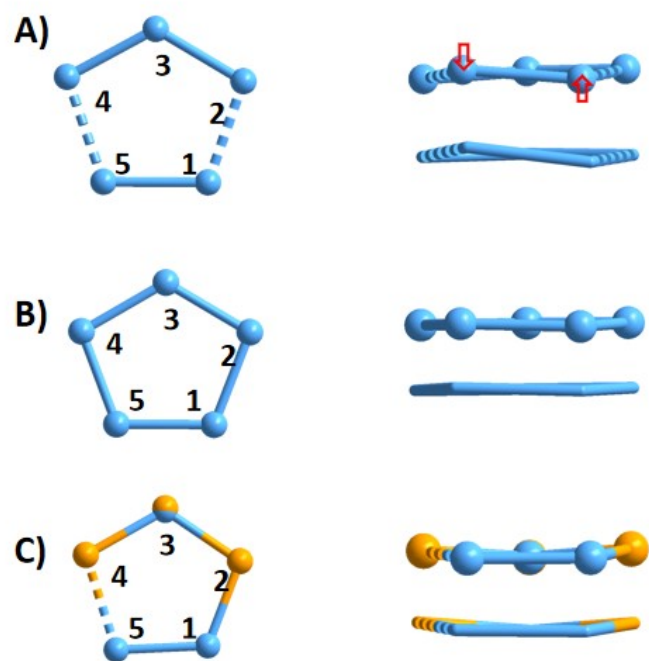

Figure S7. The framework of  $M_5$  ring in these nanoclusters. A)  $[Au_4Ag_5(SAdm)_6(Dppm)_2](BPh_4)$ ; B)  $[Au_4Ag_5(S-c-C_6H_{11})_6(Dppm)_2](BPh_4)$ ; C)  $[Au_{6.5}Ag_{2.5}(SAdm)_6(Dppm)_2](BPh_4)$ .

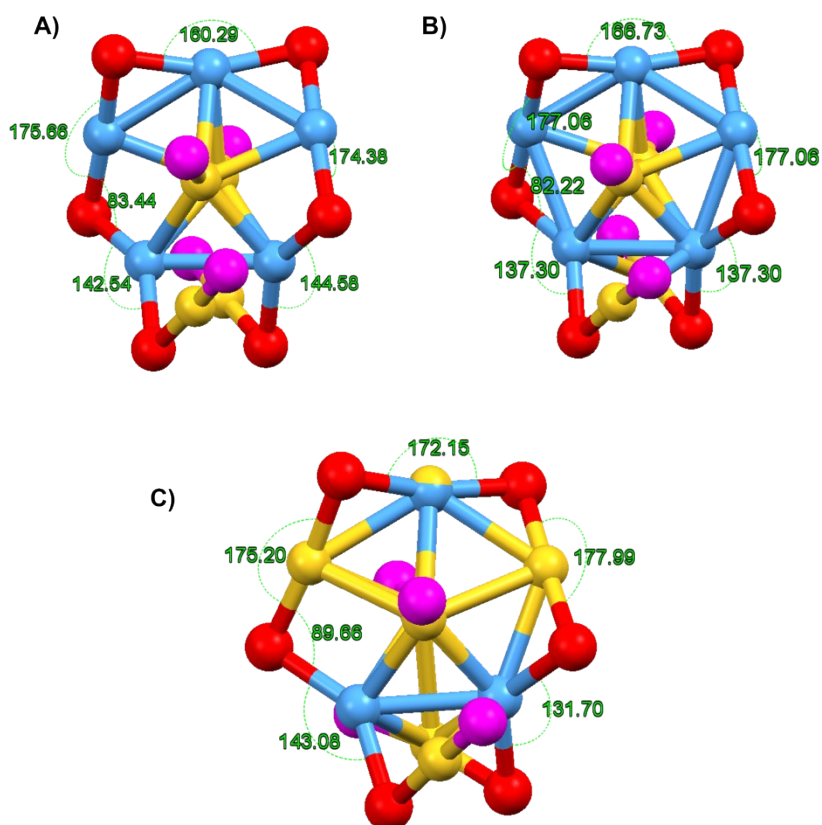

Figure S8. Different bond angles for these nanoclusters. A)  $[Au_4Ag_5(SAdm)_6(Dppm)_2](BPh_4)$ ; B)  $[Au_4Ag_5(S-c-C_6H_{11})_6(Dppm)_2](BPh_4)$ ; C)  $[Au_{6.5}Ag_{2.5}(SAdm)_6(Dppm)_2](BPh_4)$ .

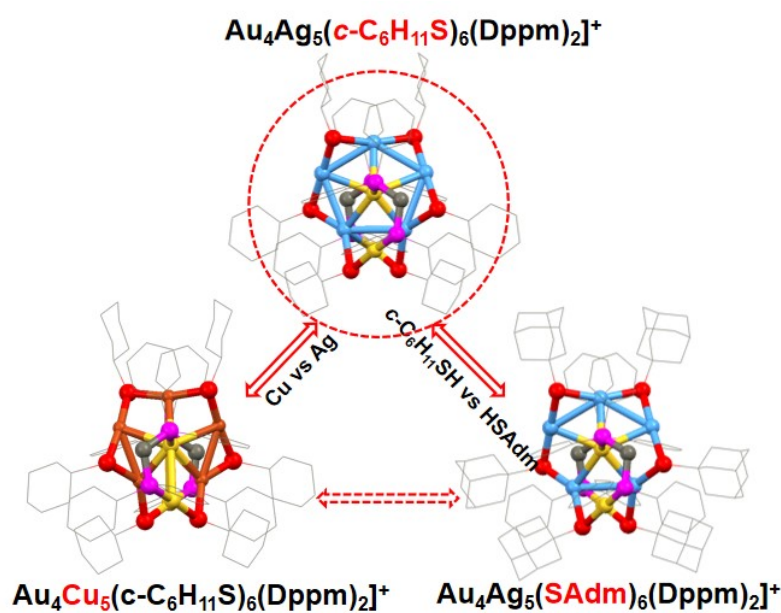

Figure S9. The obtained [Au<sub>4</sub>Ag<sub>5</sub>(S-c-C<sub>6</sub>H<sub>11</sub>)<sub>6</sub>(Dppm)<sub>2</sub>](BPh<sub>4</sub>) connecting the [Au<sub>4</sub>Ag<sub>5</sub>(SAdm)<sub>6</sub>(Dppm)<sub>2</sub>](BPh<sub>4</sub>) and [Au<sub>4</sub>Cu<sub>5</sub>(S-c-C<sub>6</sub>H<sub>11</sub>)<sub>6</sub>(Dppm)<sub>2</sub>](BPh<sub>4</sub>).

**Table S1. Crystal data and structure refinement for Au<sub>4</sub>Ag<sub>5</sub>-CHT-revised.**

|                                             |                                                                                                  |
|---------------------------------------------|--------------------------------------------------------------------------------------------------|
| Empirical formula                           | C <sub>110</sub> H <sub>130</sub> Ag <sub>5</sub> Au <sub>4</sub> BP <sub>4</sub> S <sub>6</sub> |
| Formula weight                              | 3106.40                                                                                          |
| Temperature/K                               | 120                                                                                              |
| Crystal system                              | monoclinic                                                                                       |
| Space group                                 | C2/c                                                                                             |
| a/Å                                         | 24.443(3)                                                                                        |
| b/Å                                         | 25.297(3)                                                                                        |
| c/Å                                         | 18.903(3)                                                                                        |
| α/°                                         | 90                                                                                               |
| β/°                                         | 108.051(10)                                                                                      |
| γ/°                                         | 90                                                                                               |
| Volume/Å <sup>3</sup>                       | 11113(3)                                                                                         |
| Z                                           | 4                                                                                                |
| Radiation                                   | CuKα (λ = 1.54186)                                                                               |
| Index ranges                                | -29 ≤ h ≤ 18, -30 ≤ k ≤ 28, -15 ≤ l ≤ 22                                                         |
| Independent reflections                     | 10308 [R <sub>int</sub> = 0.0768, R <sub>sigma</sub> = 0.0495]                                   |
| Data/restraints/parameters                  | 10308/1499/515                                                                                   |
| Goodness-of-fit on F <sup>2</sup>           | 1.060                                                                                            |
| Final R indexes [I >= 2σ (I)]               | R <sub>1</sub> = 0.0650, wR <sub>2</sub> = 0.1832                                                |
| Final R indexes [all data]                  | R <sub>1</sub> = 0.0744, wR <sub>2</sub> = 0.1916                                                |
| Largest diff. peak/hole / e Å <sup>-3</sup> | 2.02/-3.64                                                                                       |

**Table S2. Crystal data and structure refinement for Ag<sub>2.48</sub>Au<sub>6.53</sub>.**

|                                             |                                                                                                            |
|---------------------------------------------|------------------------------------------------------------------------------------------------------------|
| Empirical formula                           | C <sub>134.5</sub> H <sub>154</sub> Ag <sub>2.48</sub> Au <sub>6.53</sub> BCIP <sub>4</sub> S <sub>6</sub> |
| Formula weight                              | 3685.25                                                                                                    |
| Temperature/K                               | 120                                                                                                        |
| Crystal system                              | triclinic                                                                                                  |
| Space group                                 | P-1                                                                                                        |
| a/Å                                         | 18.3755(10)                                                                                                |
| b/Å                                         | 19.6063(11)                                                                                                |
| c/Å                                         | 21.8061(12)                                                                                                |
| $\alpha$ /°                                 | 103.741(4)                                                                                                 |
| $\beta$ /°                                  | 100.027(4)                                                                                                 |
| $\gamma$ /°                                 | 112.795(4)                                                                                                 |
| Volume/Å <sup>3</sup>                       | 6717.4(7)                                                                                                  |
| Z                                           | 2                                                                                                          |
| Radiation                                   | CuK $\alpha$ ( $\lambda$ = 1.54186)                                                                        |
| Index ranges                                | -18 $\leq$ h $\leq$ 22, -22 $\leq$ k $\leq$ 23, -26 $\leq$ l $\leq$ 11                                     |
| Independent reflections                     | 23983 [R <sub>int</sub> = 0.0693, R <sub>sigma</sub> = 0.0731]                                             |
| Data/restraints/parameters                  | 23983/4500/1364                                                                                            |
| Goodness-of-fit on F <sup>2</sup>           | 1.045                                                                                                      |
| Final R indexes [I $\geq$ 2 $\sigma$ (I)]   | R <sub>1</sub> = 0.0906, wR <sub>2</sub> = 0.2447                                                          |
| Final R indexes [all data]                  | R <sub>1</sub> = 0.1070, wR <sub>2</sub> = 0.2632                                                          |
| Largest diff. peak/hole / e Å <sup>-3</sup> | 3.46/-6.45                                                                                                 |
